# Supplementary material for: Microarray analysis reveals marked intestinal microbiota aberrancy in infants having eczema compared to healthy children in at-risk for atopic disease
Source: PubMed Central journal article supplement (PMC3563445; doi:10.1186/1471-2180-13-12), 2013-01-23
Supplement: 1471-2180-13-12-S1.pdf [file 1471-2180-13-12-S1.pdf]

**Additional file 1. Basic characteristics of the study subjects.**

| Subject | 6mo sample | 18mo sample | Intervention group | Total breastfeeding (months) | Health status (h/e) | First eczema symptoms (age in months) | SPT+-6kk | SPT+-24kk |
|---------|------------|-------------|--------------------|------------------------------|---------------------|---------------------------------------|----------|-----------|
| 1       | yes        | no          | placebo            | 14.0                         | h                   | -                                     | no       | no        |
| 2       | yes        | yes         | LGG                | 6.5                          | e                   | 2.0                                   | yes      | yes       |
| 3       | yes        | yes         | LGG                | 10.0                         | e                   | 5.0                                   | yes      | yes       |
| 4       | yes        | yes         | LGG                | 7.0                          | h                   | -                                     | no       | no        |
| 5       | yes        | yes         | LGG                | 7.5                          | e                   | 14.0                                  | no       | no        |
| 6       | yes        | yes         | placebo            | 8.0                          | e                   | 6.0                                   | no       | no        |
| 7       | yes        | yes         | placebo            | 7.0                          | e                   | 2.0                                   | no       | no        |
| 8       | no         | yes         | LGG                | 11.0                         | h                   | -                                     | no       | no        |
| 9       | yes        | yes         | LGG                | 7.0                          | e                   | 5.0                                   | no       | yes       |
| 10      | yes        | yes         | placebo            | 4.0                          | e                   | 3.5                                   | yes      | yes       |
| 11      | yes        | yes         | LGG                | 9.5                          | h                   | -                                     | no       | no        |
| 12      | yes        | no          | placebo            | 19.0                         | h                   | -                                     | no       | no        |
| 13      | yes        | yes         | placebo            | 10.0                         | h                   | -                                     | no       | no        |
| 14      | no         | yes         | placebo            | 11.0                         | h                   | -                                     | no       | no        |
| 15      | yes        | no          | LGG                | 12.0                         | h                   | -                                     | no       | no        |
| 16      | yes        | no          | placebo            | 13.0                         | e                   | 4.0                                   | no       | no        |
| 17      | yes        | yes         | LGG                | 4.0                          | h                   | -                                     | no       | no        |
| 18      | yes        | yes         | placebo            | 5.0                          | h                   | -                                     | no       | no        |
| 19      | yes        | no          | placebo            | 11.0                         | e                   | 7.0                                   | no       | NA        |
| 20      | yes        | no          | placebo            | 6.0                          | h                   | -                                     | no       | no        |
| 21      | yes        | yes         | placebo            | 11.0                         | e                   | 16.0                                  | no       | no        |
| 22      | yes        | yes         | placebo            | 12.0                         | e                   | 3.0                                   | no       | no        |
| 23      | yes        | yes         | LGG                | 11.0                         | h                   | -                                     | no       | no        |
| 24      | yes        | no          | LGG                | 7.0                          | h                   | -                                     | no       | no        |
| 25      | yes        | yes         | LGG                | 11.5                         | h                   | -                                     | no       | no        |
| 26      | yes        | no          | LGG                | 4.0                          | h                   | -                                     | no       | no        |
| 27      | no         | yes         | placebo            | 6.0                          | h                   | -                                     | no       | no        |
| 28      | yes        | no          | placebo            | 7.0                          | h                   | -                                     | no       | no        |
| 29      | yes        | yes         | placebo            | 10.0                         | h                   | -                                     | no       | no        |
| 30      | yes        | no          | placebo            | 11.0                         | e                   | 12.0                                  | no       | no        |
| 31      | yes        | yes         | LGG                | 7.0                          | e                   | 5.0                                   | no       | yes       |
| 32      | yes        | yes         | placebo            | 9.0                          | e                   | 2.0                                   | no       | no        |
| 33      | yes        | yes         | placebo            | 6.0                          | h                   | -                                     | no       | NA        |
| 34      | yes        | yes         | LGG                | 7.5                          | e                   | 6.0                                   | no       | no        |

Health status: h = healthy, e = eczema

LGG indicates receiving supplementation with *L. rhamnosus* GG.

SPT+ = skin prick test positive; NA= information not available
