# Supplementary material for: Microarray analysis reveals marked intestinal microbiota aberrancy in infants having eczema compared to healthy children in at-risk for atopic disease
Source: PubMed Central journal article supplement (PMC3563445; doi:10.1186/1471-2180-13-12), 2013-01-23
Supplement: 1471-2180-13-12-S2.pdf [file 1471-2180-13-12-S2.pdf]

**Additional file 2. Primers targeting *Bifidobacterium* genus and species used in this study**

| <b>Target group/species</b> | <b>Forward primer (5' to 3')</b> | <b>Reverse primer (5' to 3')</b> | <b>Reference</b> |
|-----------------------------|----------------------------------|----------------------------------|------------------|
| <i>B. genus</i>             | GATTCTGGCTCAGGATGAACGC           | CTGATAGGACGCGACCCCAT             | (69,70)          |
| <i>B. adolescentis</i>      | GGATCGGCTGGAGCTTGCTCCG           | CCCCGAAGGCTTGCTCCCAGT            | (35)             |
| <i>B. bifidum</i>           | TGACCGACCTGCCCCATGCT             | CCCATCCCACGCCGATAGAAT            | (35)             |
| <i>B. breve</i>             | AATGCCGGATGCTCCATCACAC           | GCCTTGCTCCCTAACAAAAGAGG          | (35)             |
| <i>B. catenulatum</i> group | GCCGGATGCTCCGACTCCT              | ACCCGAAGGCTTGCTCCCGAT            | (35)             |
| <i>B. longum</i> group      | TTCCAGTTGATCGCATGGTCTTCT         | GGCTACCCGTCGAAGCCACG             | (35)             |
