# Supplementary material for: Microarray analysis reveals marked intestinal microbiota aberrancy in infants having eczema compared to healthy children in at-risk for atopic disease
Source: PubMed Central journal article supplement (PMC3563445; doi:10.1186/1471-2180-13-12), 2013-01-23
Supplement: 1471-2180-13-12-S3.pdf [file 1471-2180-13-12-S3.pdf]

**Additional file 3. Differences in bifidobacterial composition of all children as assessed by using quantitative PCR.**

| Bacterial group/species      | Mean cell count (log)/g of faeces (SD) |                     | p-value |
|------------------------------|----------------------------------------|---------------------|---------|
|                              | 6 months<br>(n=31)                     | 18 months<br>(n=24) |         |
| <i>Bifidobacterium</i> genus | 10.48 (0.54)                           | 10.03 (0.51)        | < .001  |
| <i>B. longum</i> group       | 10.00 (1.25)                           | 9.01 (1.71)         | 0.01    |
| <i>B. adolescentis</i>       | 6.61 (2.61)                            | 5.25 (2.57)         | 0.05    |
| <i>B. bifidum</i>            | 6.85 (2.60)                            | 5.52 (2.23)         | 0.01    |
| <i>B. breve</i>              | 7.91 (1.77)                            | 6.31 (2.37)         | < .001  |
| <i>B. catenulatum</i> group  | 6.60 (2.21)                            | 5.46 (2.44)         | 0.07    |
