# Supplementary material for: Microarray analysis reveals marked intestinal microbiota aberrancy in infants having eczema compared to healthy children in at-risk for atopic disease
Source: PubMed Central journal article supplement (PMC3563445; doi:10.1186/1471-2180-13-12), 2013-01-23

### breast feeding

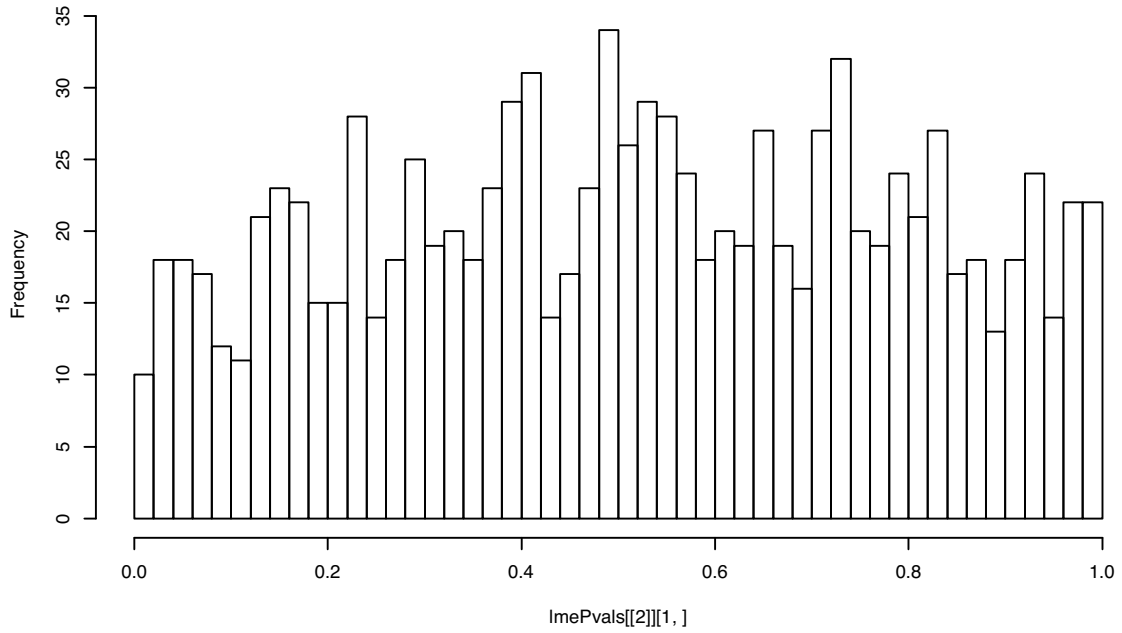

### treatment

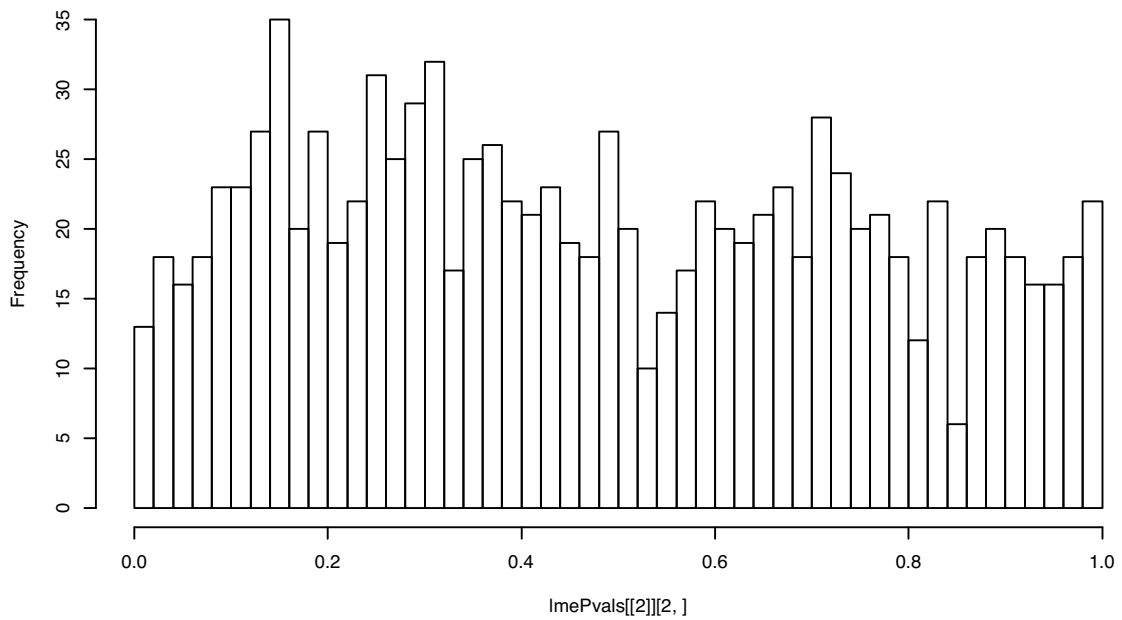

### group

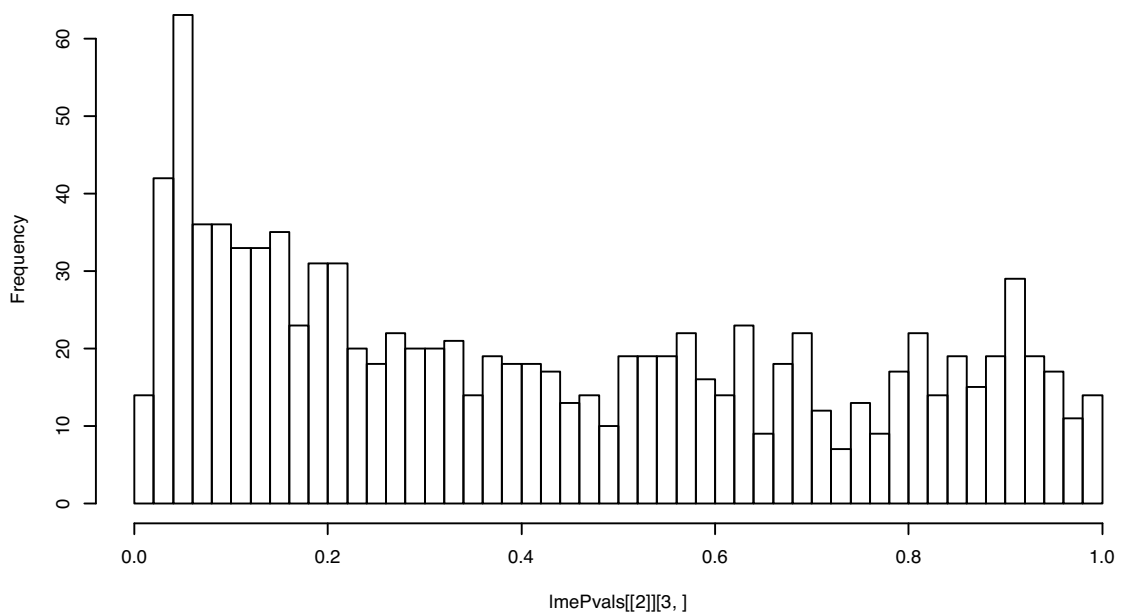

Supplement: 1471-2180-13-12-S4.pdf [file 1471-2180-13-12-S4.pdf]
