# Supplementary material for: Microarray analysis reveals marked intestinal microbiota aberrancy in infants having eczema compared to healthy children in at-risk for atopic disease
Source: PubMed Central journal article supplement (PMC3563445; doi:10.1186/1471-2180-13-12), 2013-01-23
Supplement: 1471-2180-13-12-S5.pdf [file 1471-2180-13-12-S5.pdf]

**Additional file 5. The microbiota differences of healthy and eczematous children from placebo group at the age of 18 months as assessed by HITChip analysis.**

| Phylum/order                    | Genus-like phylogenetic group | Mean relative abundance* (SD) |              |         |
|---------------------------------|-------------------------------|-------------------------------|--------------|---------|
|                                 |                               | 18 months, placebo group      |              | p-value |
|                                 |                               | Healthy (n=5)                 | Eczema (n=6) |         |
| Bacteroidetes                   |                               | 4.92 (5.70)                   | 1.34 (0.25)  | 0.15    |
|                                 | <i>B. fragilis et rel.</i>    | 1.57 (2.15)                   | 0.12 (0.02)  | 0.13    |
|                                 | <i>B. ovatus et rel.</i>      | 0.37 (0.62)                   | 0.09 (0.02)  | 0.29    |
|                                 | <i>B. plebeius et rel.</i>    | 0.08 (0.03)                   | 0.06 (0.01)  | 0.17    |
|                                 | <i>B. stercoris et rel.</i>   | 0.08 (0.03)                   | 0.05 (0.01)  | 0.16    |
|                                 | <i>B. uniformis et rel.</i>   | 0.45 (0.59)                   | 0.03 (0.01)  | 0.11    |
|                                 | <i>B. vulgatus et rel.</i>    | 1.29 (2.28)                   | 0.18 (0.09)  | 0.26    |
|                                 | <i>P. tanneriae et rel.</i>   | 0.06 (0.03)                   | 0.04 (0.01)  | 0.22    |
| <i>Clostridium</i> cluster IV   | <i>C. leptum et rel.</i>      | 1.24 (1.98)                   | 1.89 (1.10)  | 0.51    |
|                                 | <i>R. bromii et rel.</i>      | 0.33 (0.64)                   | 0.57 (0.22)  | 0.41    |
|                                 | <i>C. cellulosi et rel.</i>   | 0.88 (1.15)                   | 1.40 (0.70)  | 0.38    |
| <i>Clostridium</i> cluster XIVa | <i>R. lactaris et rel.</i>    | 0.06 (0.03)                   | 3.26 (3.71)  | 0.09    |
|                                 | <i>C. nexile et rel.</i>      | 1.60 (1.00)                   | 1.62 (0.69)  | 0.96    |

\* % of total HITChip signal
