# Supplementary material for: Microarray analysis reveals marked intestinal microbiota aberrancy in infants having eczema compared to healthy children in at-risk for atopic disease
Source: PubMed Central journal article supplement (PMC3563445; doi:10.1186/1471-2180-13-12), 2013-01-23
Supplement: 1471-2180-13-12-S6.pdf [file 1471-2180-13-12-S6.pdf]

**Additional file 6. Bifidobacterial sub-communities in infants with eczema and healthy controls as assessed by quantitative PCR and HITChip analyses.**

| Bacterial group/species                   | Mean cell count (log)/g of faeces (SD) |                  |         |                  |                 |         |
|-------------------------------------------|----------------------------------------|------------------|---------|------------------|-----------------|---------|
|                                           | 6 months                               |                  | p-value | 18 months        |                 | p-value |
|                                           | Healthy                                | Eczema           |         | Healthy          | Eczema          |         |
| <i>Bifidobacterium</i> genus              | 10.62<br>(0.42)                        | 10.35<br>(0.63)  | 0.111   | 10.15<br>(0.56)  | 9.91<br>(0.45)  | 0.26    |
| <i>B. longum</i> group                    | 10.32<br>(0.89)                        | 9.65<br>(1.49)   | 0.120   | 9.41<br>(1.62)   | 8.61<br>(1.76)  | 0.26    |
| <i>B. adolescentis</i>                    | 6.66<br>(3.14)                         | 6.56<br>(2.00)   | 0.913   | 5.65<br>(3.02)   | 4.81<br>(2.02)  | 0.43    |
| <i>B. bifidum</i>                         | 7.03<br>(2.67)                         | 6.65<br>(2.60)   | 0.675   | 5.29<br>(2.34)   | 5.02<br>(2.22)  | 0.77    |
| <i>B. breve</i>                           | 7.80<br>(1.70)                         | 8.03<br>(1.89)   | 0.707   | 5.52<br>(2.00)   | 7.04<br>(2.40)  | 0.13    |
| <i>B. catenulatum</i> group               | 6.11<br>(2.22)                         | 7.13<br>(2.15)   | 0.190   | 5.20<br>(2.32)   | 5.73<br>(2.64)  | 0.60    |
| <i>Bifidobacterium</i> et rel. (HITChip)* | 24.77<br>(16.74)                       | 20.82<br>(15.31) | 0.395   | 14.00<br>(11.49) | 11.45<br>(7.85) | 0.30    |

\*Mean relative abundance (% of total HITChip signal) (SD)
