# Supplementary material for: Microarray analysis reveals marked intestinal microbiota aberrancy in infants having eczema compared to healthy children in at-risk for atopic disease
Source: PubMed Central journal article supplement (PMC3563445; doi:10.1186/1471-2180-13-12), 2013-01-23
Supplement: 1471-2180-13-12-S9.pdf [file 1471-2180-13-12-S9.pdf]

**Additional file 9. The microbiota differences between the intervention groups (LGG or placebo) at the age of 18 months as assessed by HITChip analysis.**

| <b>Genus-like phylogenetic group</b>  | <b>Mean relative abundance* (SD)</b> |                     |                |
|---------------------------------------|--------------------------------------|---------------------|----------------|
|                                       | <b>LGG (n=)</b>                      | <b>Placebo (n=)</b> | <b>p-value</b> |
| <i>Anaerostipes caccae et rel.</i>    | 2.89 (2.13)                          | 1.18 (0.91)         | 0.03           |
| <i>Clostridium difficile et rel.</i>  | 0.78 (0.60)                          | 1.19 (0.85)         | 0.047          |
| <i>Eubacterium ventriosum et rel.</i> | 0.17 (0.11)                          | 0.11 (0.07)         | 0.04           |

\* % of total HITChip signal
